# Supplementary material for: Laser-induced graphene hybrid photoelectrode for enhanced photoelectrochemical detection of glucose
Source: Royal Society of Chemistry journal article supplement (doi:10.1039/d0an00252f), 2020-01-01
Supplement: d0an00252f1.pdf [file d0an00252f1.pdf]

## Supporting Information

# Laser-induced Graphene Hybrid Photoelectrode for Enhanced Photoelectrochemical Detection of Glucose

Hui Li, Chengxiang Guo, Changchun Liu, Lei Ge,\* and Feng Li\*

College of Chemistry and Pharmaceutical Sciences, Qingdao Agricultural University, Qingdao,  
266109, People's Republic of China

\*Corresponding author: Lei Ge, Feng Li

E-mail: lge@qau.edu.cn, lifeng@qust.edu.cn

Telephone: +86-532-58957855

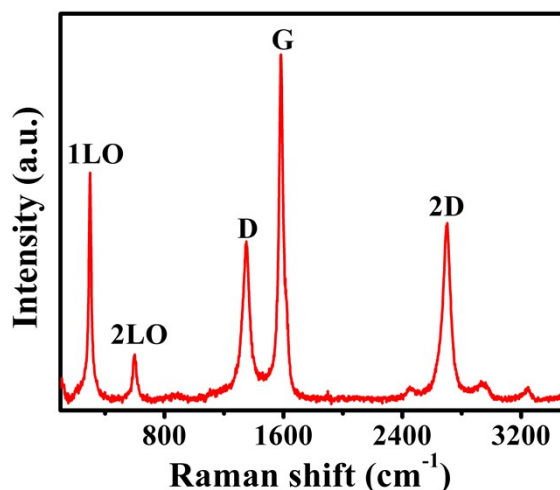

**Figure S1.** Raman spectrum of LI-NiEC-CdS-G@ITO photoelectrode.

As shown in Figure S1, the clearly identified D ( $\sim 1350\text{ cm}^{-1}$ ), G ( $\sim 1582\text{ cm}^{-1}$ ), and 2D ( $\sim 2700\text{ cm}^{-1}$ ) peaks confirm the existence of defective or multilayered structure that is the characteristic sign of LIG.<sup>1</sup> The two characteristic Raman peaks at  $\sim 299\text{ cm}^{-1}$  and  $\sim 597\text{ cm}^{-1}$  correspond to the 1LO and 2LO vibration modes of hexagonal LICdS,<sup>2</sup> respectively, suggesting the successful fabrication of both LIG and LICdS in LI-NiEC-CdS-G nanocomposite.

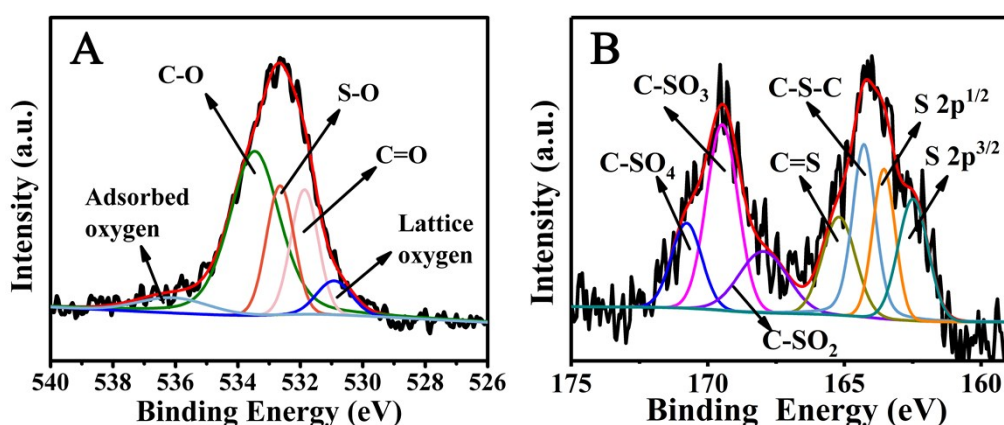

**Figure S2.** High resolution (A) O 1s and (B) S 2p XPS spectra of LI-NiEC-G@ITO.

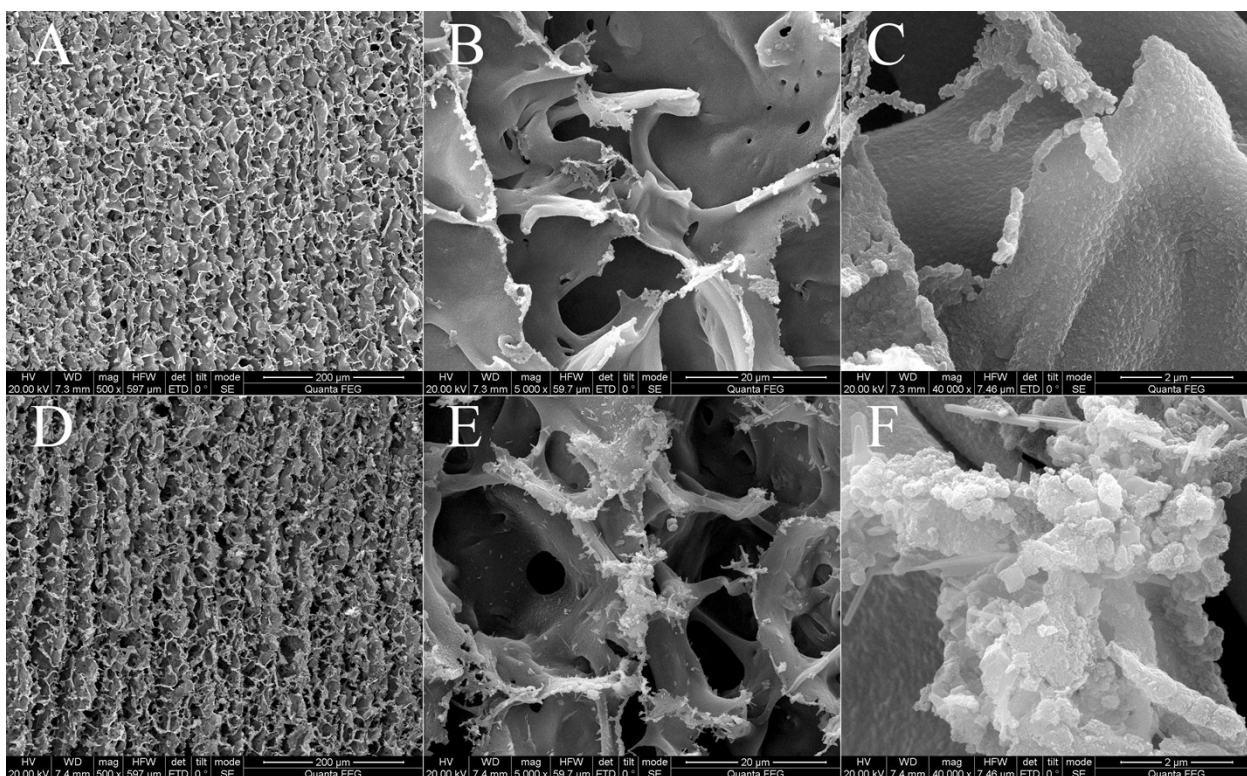

**Figure S3.** SEM images of (A-C) LIG@ITO and (D-F) LI-CdS-G@ITO photoelectrode with different magnifications.

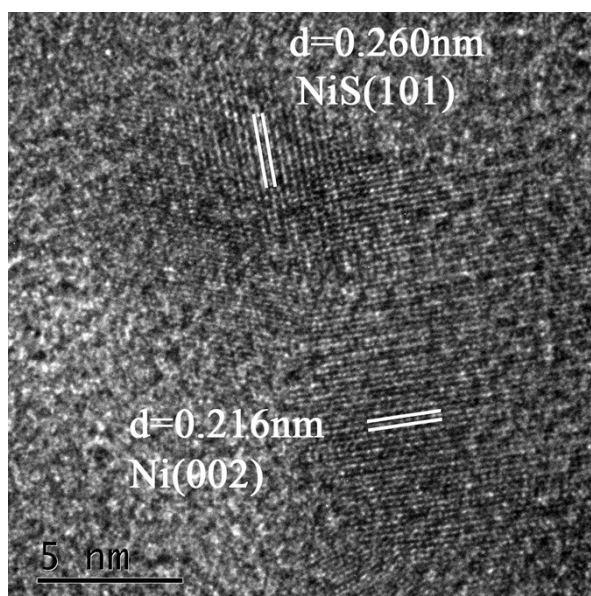

**Figure S4.** High resolution TEM image of Ni<sup>0</sup>-NiS hybrid in LI-NiEC-CdS-G nanocomposite.

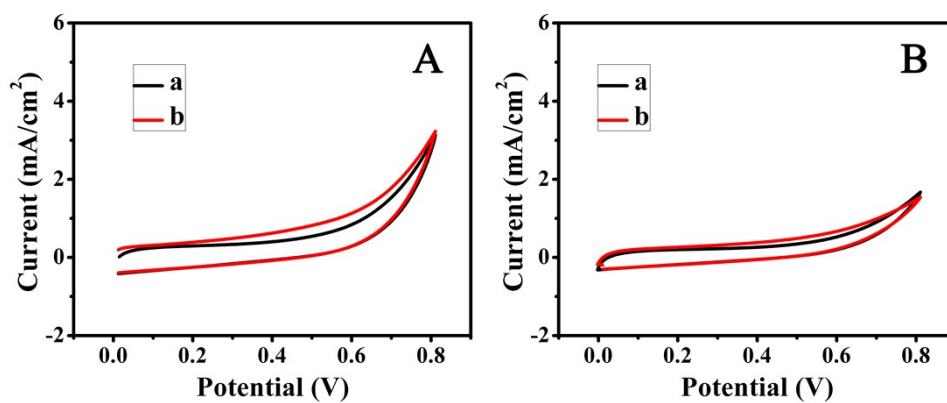

**Figure S5.** CVs of (A) LIG@ITO and (B) LI-CdS-G@ITO electrode in 0.1 M KOH (a) without and (b) with 1.0 mM glucose at a scan rate of 50 mV/s.

**Table S1.** Assay performance comparison of our method with other non-enzyme glucose sensors.

| Employed electrocatalyst@electrode                                            | Linear range                  | Detection limit | Reference |
|-------------------------------------------------------------------------------|-------------------------------|-----------------|-----------|
| NiO/SiC@GCE electrode                                                         | 4 $\mu$ M to 7.5 mM           | 0.32 $\mu$ M    | 3         |
| NiCo <sub>2</sub> O <sub>4</sub> @3D graphene foam electrode                  | 500 nM to 0.59 mM             | 0.38 $\mu$ M    | 4         |
| Ni(OH) <sub>x</sub> film@carbon cloth electrode                               | 0.004 to 0.6 mM               | 0.45 $\mu$ M    | 5         |
| Ni <sub>3</sub> S <sub>2</sub> /carbon nanotube@Ni foam electrode             | 30 to 500 $\mu$ M             | 1.0 $\mu$ M     | 6         |
| Au/TiO <sub>2</sub> @Ti photoelectrode                                        | 1 $\mu$ M to 10 mM            | 1.0 $\mu$ M     | 7         |
| Au/NiAu multilayered nanowire@ITO photoelectrode                              | 0.005 to 31 mM.               | 1.0 $\mu$ M     | 8         |
| Au/graphene/PAPBA/TiO <sub>2</sub> @ITO <sup>a</sup>                          | 0.5 to 20 mM &<br>20 to 28 mM | 0.11 mM         | 9         |
| Ni/CdS@TiO <sub>2</sub> nanotube array photoelectrode                         | 0.1 to 2mM &<br>3 to 6 mM     | 7.98 $\mu$ M    | 10        |
| Nickel–cobalt phosphate@GCE electrode                                         | 2 to 4470 $\mu$ M             | 0.4 $\mu$ M     | 11        |
| Ni <sub>3</sub> Te <sub>2</sub> @Ni foam electrode                            | 0.01 to 0.8 mM                | 0.38 $\mu$ M    | 12        |
| Ni/CdS@Ti@TiO <sub>2</sub> core–shell nanowire electrode                      | 0.005 to 12 mM,               | 0.35 $\mu$ M    | 13        |
| Ni-MOF/Ni/NiO/C@GCE nanocomposite electrode                                   | 4 to 5664 $\mu$ M             | 0.8 $\mu$ M     | 14        |
| Carbon nanotube–nickel@GCE electrode                                          | 5.0 $\mu$ M to 2.0 mM         | 2.0 $\mu$ M     | 15        |
| IrO <sub>2</sub> /NiO core–shell nanowire@GCEelectrode                        | 0.5 $\mu$ M to 2.5 mM         | 0.31 $\mu$ M    | 16        |
| Ni nanoparticle@carbon nanofiber paste electrode.                             | 2 $\mu$ M to 2.5 mM           | 1.0 $\mu$ M     | 17        |
| NiO@Buckypaper electrode                                                      | 0.1 to 9 mM                   | 14 $\mu$ M      | 18        |
| Ni(OH) <sub>2</sub> nanosheet@Ni foam electrode                               | 0.46 to 2100 $\mu$ M.         | 0.46 $\mu$ M    | 19        |
| Ni <sub>3</sub> S <sub>2</sub> nanosheet@Ni foam electrode                    | 0.005 to 3.0 mM               | 1.2 $\mu$ M     | 20        |
| NiS/Ni(OH) <sub>2</sub> -NH <sub>4</sub> PA/PPyNTs@GCE electrode <sup>b</sup> | 0 to 600 $\mu$ M              | 3.1 $\mu$ M     | 21        |
| LI-NiEC-CdS-G@ITO photoelectrode                                              | 1.0 $\mu$ M to 1.0 mM         | 0.4 $\mu$ M     | This work |

<sup>a</sup> PAPBA: poly[3-aminophenylboronic acid]; <sup>b</sup> NH<sub>4</sub>PA/PPyNTs: ammonium polyacrylate-functionalized polypyrrole nanotubes

## References

- 1 J. Lin, Z. Peng, Y. Liu, F. Ruiz-Zepeda, R. Ye, E. L. G. Samuel, M. J. Yacaman, B. I. Yakobson and J. M. Tour, *Nat. Commun.*, 2014, **5**, 5714.
- 2 M. Wang, L. Cai, Y. Wang, F. Zhou, K. Xu, X. Tao and Y. Chai, *J. Am. Chem. Soc.*, 2017, **139**, 4144-4151.
- 3 P. Yang, X. Tong, G. Wang, Z. Gao, X. Guo and Y. Qin, *ACS Appl. Mater. Interfaces*, 2015, **7**, 4772-4777.
- 4 M. Wu, S. Meng, Q. Wang, W. Si, W. Huang and X. Dong, *ACS Appl. Mater. Interfaces*, 2015, **7**, 21089-21094.
- 5 Q. Wa, W. Xiong, R. Zhao, Z. He, Y. Chen and X. Wang, *ACS Appl. Nano Mater.*, 2019, **2**, 4427-4434.
- 6 T.-W. Lin, C.-J. Liu and C.-S. Dai, *Appl. Catal. B*, 2014, **154-155**, 213-220.
- 7 L. Guo, Z. Li, K. Marcus, S. Navarro, K. Liang, L. Zhou, P. D. Mani, S. J. Florczyk, K. R. Coffey, N. Orlovskaya, Y.-H. Sohn and Y. Yang, *ACS Sens.*, 2017, **2**, 621-625.
- 8 L. Wang, W. Zhu, W. Lu, X. Qin and X. Xu, *Biosens. Bioelectron.*, 2018, **111**, 41-46.
- 9 M. Nallal, G. Anantha Iyengar and K. Pill-Lee, *ACS Appl. Mater. Interfaces*, 2017, **9**, 37166-37183.
- 10 H. Huo, Z. Xu, T. Zhang and C. Xu, *J. Mater. Chem. A*, 2015, **3**, 5882-5888.
- 11 Y. Shu, B. Li, J. Chen, Q. Xu, H. Pang and X. Hu, *ACS Appl. Mater. Interfaces*, 2018, **10**, 2360-2367.
- 12 B. Golrokh Amin, U. De Silva, J. Masud and M. Nath, *ACS Omega*, 2019, **4**, 11152-11162.
- 13 C. Guo, H. Huo, X. Han, C. Xu and H. Li, *Anal. Chem.*, 2014, **86**, 876-883.
- 14 Y. Shu, Y. Yan, J. Chen, Q. Xu, H. Pang and X. Hu, *ACS Appl. Mater. Interfaces*, 2017, **9**, 22342-22349.
- 15 T. Choi, S. H. Kim, C. W. Lee, H. Kim, S.-K. Choi, S.-H. Kim, E. Kim, J. Park and H. Kim, *Biosens. Bioelectron.*, 2015, **63**, 325-330.
- 16 J. Wang, L. Xu, Y. Lu, K. Sheng, W. Liu, C. Chen, Y. Li, B. Dong and H. Song, *Anal. Chem.*, 2016, **88**, 12346-12353.
- 17 Y. Liu, H. Teng, H. Hou and T. You, *Biosens. Bioelectron.*, 2009, **24**, 3329-3334.
- 18 T. Zhu, Y. Zhang, L. Luo and X. Zhao, *ACS Appl. Mater. Interfaces*, 2019, **11**, 10856-10861.
- 19 W. Mao, H. He, P. Sun, Z. Ye and J. Huang, *ACS Appl. Mater. Interfaces*, 2018, **10**, 15088-15095.
- 20 H. Huo, Y. Zhao and C. Xu, *J. Mater. Chem. A*, 2014, **2**, 15111-15117.
- 21 H. Mao, Z. Cao, X. Guo, D. Sun, D. Liu, S. Wu, Y. Zhang and X.-M. Song, *ACS Appl. Mater. Interfaces*, 2019, **11**, 10153-10162.
